# Supplementary material
Source: PubMed Central journal article supplement (PMC2690426)
Supplement: jc.2008-2338_1.pdf [file jc.2008-2338_1.pdf]

**Supplemental Data Table 1: Blood Pressure, Laboratory Tests, and Metabolic Indices Monitored During Study Therapy**

| Variable                                                | Low Testosterone                   |                             |                             | High Testosterone               |                             |                             | ANOVA<br>P-value |
|---------------------------------------------------------|------------------------------------|-----------------------------|-----------------------------|---------------------------------|-----------------------------|-----------------------------|------------------|
|                                                         | GH Placebo<br>(n=19)<br>Group A    | GH 3ug<br>(n=19)<br>Group B | GH 5ug<br>(n=20)<br>Group C | GH Placebo<br>(n=20)<br>Group D | GH 3ug<br>(n=17)<br>Group E | GH 5ug<br>(n=17)<br>Group F |                  |
| <b>Systolic Blood Pressure <i>mmHg</i><sup>a</sup></b>  |                                    |                             |                             |                                 |                             |                             |                  |
| Baseline                                                | 121±15                             | 117±13                      | 113±13                      | 118±15                          | 119±13                      | 116±12                      | p=0.57           |
| Week 16                                                 | 134±18                             | 129±18                      | 124±21                      | 131±14                          | 129±23                      | 131±13                      | p=0.66           |
| Change at Week 16                                       | 13±16<br>13 (-26, 42) <sup>b</sup> | 13±17<br>13 (-36, 38)       | 12±18<br>13 (-18, 39)       | 15±9<br>16 (-3, 30)             | 9±14<br>10 (-14, 34)        | 15±13<br>17 (-7, 37)        |                  |
| Paired t-test                                           | 0.001                              | 0.01                        | 0.01                        | <0.0001                         | 0.02                        | 0.0003                      |                  |
| <b>Diastolic Blood Pressure <i>mmHg</i><sup>a</sup></b> |                                    |                             |                             |                                 |                             |                             |                  |
| Baseline                                                | 70±8                               | 68±7                        | 66±7                        | 68±5                            | 68±6                        | 69±9                        | p=0.57           |
| Week 16                                                 | 77±8                               | 76±8                        | 74±8                        | 76±7                            | 75±10                       | 79±11                       | p=0.64           |
| Change at Week 16                                       | 7±9<br>7 (-11, 19)                 | 7±8<br>8 (-7, 21)           | 8±9<br>8 (-8, 23)           | 8±5<br>8 (-3, 16)               | 7±8<br>6 (-6, 22)           | 10±10<br>8 (-12, 27)        |                  |
| Paired t-test                                           | 0.004                              | 0.001                       | 0.0002                      | <0.0001                         | 0.003                       | 0.001                       |                  |

a. For blood pressure, the baseline value was taken from the minimum value among pre-entry 1, 2, 3, and baseline values. The value for week 16 was taken from minimum value among three measures at that visit.

b. Median (range)

**Supplemental Data Table 1: Blood Pressure, Laboratory Tests, and Metabolic Indices Monitored During Study Therapy (continued)**

| Variable                                     | Low Testosterone                |                             |                             | High Testosterone               |                             |                             | ANOVA P-value |
|----------------------------------------------|---------------------------------|-----------------------------|-----------------------------|---------------------------------|-----------------------------|-----------------------------|---------------|
|                                              | GH Placebo<br>(n=19)<br>Group A | GH 3ug<br>(n=19)<br>Group B | GH 5ug<br>(n=20)<br>Group C | GH Placebo<br>(n=20)<br>Group D | GH 3ug<br>(n=17)<br>Group E | GH 5ug<br>(n=17)<br>Group F |               |
| <b>Hematocrit %</b>                          |                                 |                             |                             |                                 |                             |                             |               |
| Baseline                                     | 43±3                            | 43±1                        | 44±2                        | 42±2                            | 43±2                        | 43±2                        | p=0.34        |
| Week 16                                      | 45±3                            | 43±2                        | 45±4                        | 44±3                            | 46±3                        | 45±3                        | p=0.52        |
| Change at Week 16                            | 2±3<br>3 (-4, 5)                | 1±3<br>0 (-5, 6)            | 1±3<br>1 (-3, 7)            | 3±4<br>3 (-4, 12)               | 3±3<br>4 (-3, 7)            | 3±3<br>3 (-5, 8)            |               |
| Paired t-test                                | 0.01†                           | 0.33                        | 0.14                        | 0.003                           | 0.001                       | 0.004                       |               |
| <b>Prostate Specific Antigen (PSA) ng/mL</b> |                                 |                             |                             |                                 |                             |                             |               |
| Baseline                                     | 1.8±1.0                         | 1.2±0.7                     | 1.5±1.0                     | 1.4±0.8                         | 1.7±0.7                     | 1.4±0.9                     | p=0.45        |
| Week 16                                      | 1.9±1.2                         | 1.4±0.8                     | 1.6±1.1                     | 1.6±1.2                         | 2.0±1.2                     | 1.8±1.1                     | p=0.68        |
| Change at Week 16                            | 0.1±0.9<br>0.1 (-3.0, 1.1)      | 0.1±0.3<br>0.1 (-0.4, 0.8)  | 0.1±0.8<br>0.1 (-1.8, 1.4)  | 0.3±0.9<br>0.2 (-1.1, 3.4)      | 0.3±1.1<br>0.0 (-1.0, 3.3)  | 0.4±0.5<br>0.4 (-0.2, 1.6)  |               |
| Paired t-test                                | 0.15†                           | 0.11†                       | 0.53                        | 0.12†                           | 0.59†                       | 0.003                       |               |

† When assumption of normality was violated, p-value was from Signed test.

**Supplemental Data Table 1: Blood Pressure, Laboratory Tests, and Metabolic Indices Monitored During Study Therapy (continued)**

| Variable                            | Low Testosterone                |                             |                             | High Testosterone               |                             |                             | ANOVA<br>P-value |
|-------------------------------------|---------------------------------|-----------------------------|-----------------------------|---------------------------------|-----------------------------|-----------------------------|------------------|
|                                     | GH Placebo<br>(n=19)<br>Group A | GH 3ug<br>(n=19)<br>Group B | GH 5ug<br>(n=20)<br>Group C | GH Placebo<br>(n=20)<br>Group D | GH 3ug<br>(n=17)<br>Group E | GH 5ug<br>(n=17)<br>Group F |                  |
| <b>Alanine Aminotransferase U/L</b> |                                 |                             |                             |                                 |                             |                             |                  |
| Baseline                            | 29±8                            | 30±6                        | 31±10                       | 29±10                           | 31±12                       | 32±10                       | p=0.95           |
| Week 16                             | 29±7                            | 34±11                       | 30±9                        | 30±13                           | 30±13                       | 30±8                        | p=0.80           |
| Change at Week 16                   | 0±6<br>0 (-14, 13)              | 4±10<br>1 (-7, 28)          | -1±6<br>-1 (-14, 15)        | 0±16<br>-3 (-24, 49)            | -1±13<br>-1 (-38, 30)       | -1±7<br>-1 (-16, 14)        |                  |
| Paired t-test                       | 0.91                            | 0.41†                       | 0.57                        | 0.40†                           | 0.83†                       | 0.45                        |                  |
| <b>Fasting Blood Sugar mg/dL</b>    |                                 |                             |                             |                                 |                             |                             |                  |
| Baseline                            | 92±9                            | 92±8                        | 93±0                        | 88±8                            | 92±18                       | 93±9                        | p=0.78           |
| Week 16                             | 93±15                           | 98±10                       | 93±15                       | 93±10                           | 95±14                       | 96±10                       | p=0.80           |
| Change at Week 16                   | 1±10<br>1 (-21, 18)             | 5±10<br>3 (-7, 26)          | 0±13<br>3 (-33, 16)         | 5±8<br>4 (-8, 19)               | 4±11<br>6 (-21, 20)         | 3±9<br>3 (-12,23)           |                  |
| Paired t-test                       | 0.59                            | 0.10†                       | 0.91                        | 0.01                            | 0.15                        | 0.19                        |                  |

† When assumption of normality was violated, p-value was from Signed test.

**Supplemental Data Table 1: Blood Pressure, Laboratory Tests, and Metabolic Indices Monitored During Study Therapy (continued)**

| Variable                   | Low Testosterone                       |                                          |                                          | High Testosterone                        |                                          |                                         | ANOVA P-value |
|----------------------------|----------------------------------------|------------------------------------------|------------------------------------------|------------------------------------------|------------------------------------------|-----------------------------------------|---------------|
|                            | GH Placebo<br>(n=19)<br>Group A        | GH 3ug<br>(n=19)<br>Group B              | GH 5ug<br>(n=20)<br>Group C              | GH Placebo<br>(n=20)<br>Group D          | GH 3ug<br>(n=17)<br>Group E              | GH 5ug<br>(n=17)<br>Group F             |               |
| <b>HOMA-IR<sup>a</sup></b> |                                        |                                          |                                          |                                          |                                          |                                         |               |
| Baseline                   | 1.4±0.8                                | 1.6±1.5                                  | 1.9±1.0                                  | 1.4±0.6                                  | 1.5±1.2                                  | 1.7±0.9                                 | p=0.53        |
| Week 16                    | 1.7±1.3                                | 1.8±1.5                                  | 2.4±1.3                                  | 2.5±3.8                                  | 1.9±1.2                                  | 2.1±2.0                                 | p=0.71        |
| Change at Week 16          | 0.3±0.8<br>-0.1 (-0.6, 2.4)            | 0.3±1.9<br>0.3 (-5.1, 5.6)               | 1.0±2.6<br>0.7 (-1.9, 11.0)              | 1.1±3.4<br>0.3 (-0.6, 15.4)              | 0.3±1.2<br>0.2 (-1.7, 2.9)               | 0.3±1.7<br>0.1 (-1.6, 5.0)              |               |
| Paired t-test              | 0.22                                   | 0.06†                                    | 0.09                                     | 0.03†                                    | 0.32                                     | 0.41                                    |               |
| <b>QUICKI</b>              |                                        |                                          |                                          |                                          |                                          |                                         |               |
| Baseline                   | 1.4±0.8                                | 1.6±1.5                                  | 1.9±1.0                                  | 1.4±0.6                                  | 1.5±1.2                                  | 1.7±0.9                                 | p=0.55        |
| Week 16                    | 1.7±1.3                                | 1.8±1.5                                  | 2.4±1.3                                  | 2.5±3.8                                  | 1.9±1.2                                  | 2.1±2.0                                 | p=0.80        |
| Change at Week 16          | 0.000±0.010<br>0.002<br>(-0.026,0.021) | -0.004±0.015<br>-0.007<br>(-0.037,0.026) | -0.004±0.016<br>-0.007<br>(-0.028,0.027) | -0.007±0.013<br>-0.008<br>(-0.038,0.013) | -0.006±0.016<br>-0.006<br>(-0.040,0.018) | 0.001±0.015<br>-0.002<br>(-0.033,0.025) |               |
| Paired t-test              | 0.96                                   | 0.24                                     | 0.28                                     | 0.05                                     | 0.16                                     | 0.88                                    |               |

a. HOMA-IR =  $[(I_f) \times (G_f)]/22.5$ , where  $(I_f)$  is the fasting insulin level ( $\mu$ U/ml) and  $(G_f)$  is the fasting glucose level (mmol/L)

b. QUICKI =  $1/[\log(I_f) + \log(G_f)]$ , where  $(I_f)$  is the fasting insulin level (uU/ml) and  $(G_f)$  is the fasting glucose level (mg/dL)

† When assumption of normality was violated, p-value was from Signed test.

**Supplemental Data Table 1: Blood Pressure, Laboratory Tests, and Metabolic Indices Monitored During Study Therapy (continued)**

| Variable                              | Low Testosterone                |                             |                             | High Testosterone               |                             |                             | ANOVA<br>P-value |
|---------------------------------------|---------------------------------|-----------------------------|-----------------------------|---------------------------------|-----------------------------|-----------------------------|------------------|
|                                       | GH Placebo<br>(n=19)<br>Group A | GH 3ug<br>(n=19)<br>Group B | GH 5ug<br>(n=20)<br>Group C | GH Placebo<br>(n=20)<br>Group D | GH 3ug<br>(n=17)<br>Group E | GH 5ug<br>(n=17)<br>Group F |                  |
| <b>Triglyceride <i>mg/dL</i></b>      |                                 |                             |                             |                                 |                             |                             |                  |
| Baseline                              | 126±64                          | 112±40                      | 142±69                      | 125±63                          | 114±50                      | 130±73                      | p=0.72           |
| Week 16                               | 111±50                          | 100±43                      | 131±56                      | 105±42                          | 101±33                      | 90±37                       | p=0.13           |
| Change at Week 16                     | -15±68<br>-8 (-190, 150)        | -12±42<br>-13 (-66, 128)    | -11±54<br>-13 (-118, 92)    | -20±42<br>-12 (-125, 29)        | -13±56<br>-3 (-123, 72)     | -40±77<br>-25 (-276, 74)    |                  |
| Paired t-test                         | 0.35                            | 0.03†                       | 0.39                        | 0.06†                           | 0.36                        | 0.003†                      |                  |
| <b>Total Cholesterol <i>mg/dL</i></b> |                                 |                             |                             |                                 |                             |                             |                  |
| Baseline                              | 172±23                          | 174±28                      | 170±32                      | 179±28                          | 179±26                      | 174±32                      | p=0.91           |
| Week 16                               | 183±34                          | 183±28                      | 169±26                      | 184±35                          | 178±25                      | 161±24                      | p=0.10           |
| Change at Week 16                     | 11±29<br>14 (-63, 45)           | 10±20<br>7 (-28, 47)        | -1±25<br>-2 (-63, 35)       | 5±30<br>4 (-41, 86)             | -1±32<br>-4 (-95, 56)       | -13±23<br>-12 (-69, 23)     |                  |
| Paired t-test                         | 0.02†                           | 0.04                        | 0.81                        | 0.45                            | 0.97†                       | 0.04                        |                  |

† When assumption of normality was violated, p-value was from Signed test.

**Supplemental Data Table 1: Blood Pressure, Laboratory Tests, and Metabolic Indices Monitored During Study Therapy**

| Variable          | Low Testosterone                |                             |                             | High Testosterone               |                             |                             | ANOVA<br>P-value |
|-------------------|---------------------------------|-----------------------------|-----------------------------|---------------------------------|-----------------------------|-----------------------------|------------------|
|                   | GH Placebo<br>(n=19)<br>Group A | GH 3ug<br>(n=19)<br>Group B | GH 5ug<br>(n=20)<br>Group C | GH Placebo<br>(n=20)<br>Group D | GH 3ug<br>(n=17)<br>Group E | GH 5ug<br>(n=17)<br>Group F |                  |
| <b>HDL mg/dL</b>  |                                 |                             |                             |                                 |                             |                             |                  |
| Baseline          | 43±8                            | 46±17                       | 39±10                       | 44±9                            | 44±13                       | 42±11                       | p=0.65           |
| Week 16           | 48±8                            | 50±20                       | 42±10                       | 46± 8                           | 49±11                       | 44±10                       | p=0.36           |
| Change at Week 16 | 5 ±7<br>5 (-14, 18)             | 4±9<br>4 (-15, 22)          | 3±6<br>4 (-8, 12)           | 2±6<br>2 (-10, 15)              | 4±6<br>4 (-6, 12)           | 2±7<br>3 (-11, 15)          |                  |
| Paired t-test     | 0.01                            | 0.04                        | 0.04                        | 0.10                            | 0.004                       | 0.25                        |                  |
| <b>LDL mg/dL</b>  |                                 |                             |                             |                                 |                             |                             |                  |
| Baseline          | 103±30                          | 105±28                      | 101±26                      | 109±25                          | 111±24                      | 105±26                      | p=0.86           |
| Week 16           | 114±34                          | 114±26                      | 100±26                      | 117±30                          | 112±27                      | 100±27                      | p=0.30           |
| Change at Week 16 | 11±22<br>10 (-57, 42)           | 9±20<br>6 (-29, 42)         | -1±23<br>2 (-44, 47)        | 7±26<br>5 (-32, 75)             | 1±28<br>-2 (-68, 47)        | -5±18<br>-4 (-56, 22)       |                  |
| Paired t-test     | 0.01                            | 0.06                        | 0.87                        | 0.21                            | 0.94                        | 0.24                        |                  |
